# Supplementary material
Source: bioRxiv or medRxiv preprint supplement (https://www.biorxiv.org/highwire/filestream/120931/field_highwire_adjunct_files/0/399360-1.pdf)
Supplement: Supplementary file [file 399360-1.pdf]

**Supplemental Information for:**

**Genomic signatures of sympatric speciation with historical and  
contemporary gene flow in a tropical anthozoan**

Benjamin M. Titus<sup>1, ^, \*</sup>, Paul D. Blischak<sup>1</sup>, Marymegan Daly<sup>1</sup>

<sup>1</sup>Department of Evolution, Ecology, and Organismal Biology, The Ohio State University,  
Columbus, Ohio, 43212, USA

<sup>^</sup>Current Address: Division of Invertebrate Zoology, The American Museum of Natural History,  
New York, NY 10024, USA

**Supplementary Tables:** Tables S1-S3

**Supplementary Figures:** Figure S1

## Supplementary Tables

Table S1. List of *Bartholomea annulata* samples used in the full double-digest Restriction Site Associated DNA sequencing (ddRADseq) dataset analysis. Sample ID refers to unique identifier code provided to each individual in the dataset. Locality refers to the broad biogeographic country/island of origin of each sample. Sample site refers to the specific reef or sample site each sample was collected from at each Locality. GPS coordinates are provided for each Sample Site. Samples are listed alphabetically by locality then numerically by Sample ID.

| Species            | Sample ID | Locality                 | Sample Site         | Latitude      | Longitude     |
|--------------------|-----------|--------------------------|---------------------|---------------|---------------|
| <i>B. annulata</i> | BHBA2     | Eleuthera,<br>Bahamas    | Something to<br>See | 24°49'5.28"N  | 76°20'51.80"W |
| <i>B. annulata</i> | BHBA3     | Eleuthera,<br>Bahamas    | Something to<br>See | 24°49'5.28"N  | 76°20'51.80"W |
| <i>B. annulata</i> | BHBA6     | Eleuthera,<br>Bahamas    | Something to<br>See | 24°49'5.28"N  | 76°20'51.80"W |
| <i>B. annulata</i> | BHBA8     | Eleuthera,<br>Bahamas    | Something to<br>See | 24°49'5.28"N  | 76°20'51.80"W |
| <i>B. annulata</i> | BHBA13    | Eleuthera,<br>Bahamas    | Something to<br>See | 24°49'5.28"N  | 76°20'51.80"W |
| <i>B. annulata</i> | BHBA14    | Eleuthera,<br>Bahamas    | Lion Patch          | 24°49'44.51"N | 76°16'46.11"W |
| <i>B. annulata</i> | BHBA18    | Eleuthera,<br>Bahamas    | Lion Patch          | 24°49'44.51"N | 76°16'46.11"W |
| <i>B. annulata</i> | BHBA20    | Eleuthera,<br>Bahamas    | Lion Patch          | 24°49'44.51"N | 76°16'46.11"W |
| <i>B. annulata</i> | BHBA23    | Eleuthera,<br>Bahamas    | Lion Patch          | 24°49'44.51"N | 76°16'46.11"W |
| <i>B. annulata</i> | SANBA4    | San Salvador,<br>Bahamas | Fernandez<br>Bay    | 24°2'37.12"N  | 74°31'59.83"W |
| <i>B. annulata</i> | SANBA13   | San Salvador,<br>Bahamas | Fernandez<br>Bay    | 24°2'37.12"N  | 74°31'59.83"W |
| <i>B. annulata</i> | BRBA6     | Barbados                 | Bellairs            | 13°11'30.52"N | 59°38'29.04"W |
| <i>B. annulata</i> | BRBA17    | Barbados                 | Bellairs            | 13°11'30.52"N | 59°38'29.04"W |
| <i>B. annulata</i> | BRBA20    | Barbados                 | Bellairs            | 13°11'30.52"N | 59°38'29.04"W |
| <i>B. annulata</i> | BRBA25    | Barbados                 | Bellairs            | 13°11'30.52"N | 59°38'29.04"W |
| <i>B. annulata</i> | BRBA27    | Barbados                 | Jolly Roger         | 13°11'13.04"N | 59°38'22.94"W |
| <i>B. annulata</i> | BRBA33    | Barbados                 | Jolly Roger         | 13°11'13.04"N | 59°38'22.94"W |
| <i>B. annulata</i> | BRBA35    | Barbados                 | Jolly Roger         | 13°11'13.04"N | 59°38'22.94"W |
| <i>B. annulata</i> | BRBA37    | Barbados                 | Jolly Roger         | 13°11'13.04"N | 59°38'22.94"W |
| <i>B. annulata</i> | BRBA39    | Barbados                 | Jolly Roger         | 13°11'13.04"N | 59°38'22.94"W |
| <i>B. annulata</i> | BDBA3     | Bermuda                  | Lagoonal<br>Shelf   | 32°26'53.62"N | 64°45'45.42"W |
| <i>B. annulata</i> | BDBA7     | Bermuda                  | Lagoonal<br>Shelf   | 32°26'53.62"N | 64°45'45.42"W |
| <i>B. annulata</i> | BDBA10    | Bermuda                  | Lagoonal<br>Shelf   | 32°26'53.62"N | 64°45'45.42"W |
| <i>B. annulata</i> | BDBA30    | Bermuda                  | Harrington<br>Sound | 32°20'18.06"N | 64°42'44.98"W |
| <i>B. annulata</i> | BDBA31    | Bermuda                  | Harrington<br>Sound | 32°20'18.06"N | 64°42'44.98"W |
| <i>B. annulata</i> | BDBA33    | Bermuda                  | Harrington<br>Sound | 32°20'18.06"N | 64°42'44.98"W |

|                    |         |                              |                  |               |               |
|--------------------|---------|------------------------------|------------------|---------------|---------------|
| <i>B. annulata</i> | BDBA37  | Bermuda                      | Harrington Sound | 32°20'18.06"N | 64°42'44.98"W |
| <i>B. annulata</i> | BDBA38  | Bermuda                      | Harrington Sound | 32°20'18.06"N | 64°42'44.98"W |
| <i>B. annulata</i> | BDBA39  | Bermuda                      | Harrington Sound | 32°20'18.06"N | 64°42'44.98"W |
| <i>B. annulata</i> | CUBA26  | Curacao                      | CARMABI          | 12°7'19.45"N  | 68°58'10.80"W |
| <i>B. annulata</i> | CUBA27  | Curacao                      | CARMABI          | 12°7'19.45"N  | 68°58'10.80"W |
| <i>B. annulata</i> | FTBA1   | Ft. Lauderdale, Florida, USA | Hog Heaven       | 26°8'50.69"N  | 80°4'11.45"W  |
| <i>B. annulata</i> | FTBA6   | Ft. Lauderdale, Florida, USA | Hog Heaven       | 26°8'50.69"N  | 80°4'11.45"W  |
| <i>B. annulata</i> | FTBA7   | Ft. Lauderdale, Florida, USA | Hog Heaven       | 26°8'50.69"N  | 80°4'11.45"W  |
| <i>B. annulata</i> | FTBA11  | Ft. Lauderdale, Florida, USA | Hog Heaven       | 26°8'50.69"N  | 80°4'11.45"W  |
| <i>B. annulata</i> | FTBA12  | Ft. Lauderdale, Florida, USA | Hog Heaven       | 26°8'50.69"N  | 80°4'11.45"W  |
| <i>B. annulata</i> | FTBA19  | Ft. Lauderdale, Florida, USA | Caves            | 26°7'31.0"N   | 80°5'31.00"W  |
| <i>B. annulata</i> | FTBA21  | Ft. Lauderdale, Florida, USA | Caves            | 26°7'31.0"N   | 80°5'31.00"W  |
| <i>B. annulata</i> | FTBA140 | Ft. Lauderdale, Florida, USA | Caves            | 26°7'31.0"N   | 80°5'31.00"W  |
| <i>B. annulata</i> | FTBA147 | Ft. Lauderdale, Florida, USA | Caves            | 26°7'31.0"N   | 80°5'31.00"W  |
| <i>B. annulata</i> | UKBA9   | Upper Keys, Florida, USA     | Pickles Reef     | 24°59'15"N    | 80°24'52"W    |
| <i>B. annulata</i> | UKBA10  | Upper Keys, Florida, USA     | Pickles Reef     | 24°59'15"N    | 80°24'52"W    |
| <i>B. annulata</i> | UKBA122 | Upper Keys, Florida, USA     | Pickles Reef     | 24°59'15"N    | 80°24'52"W    |
| <i>B. annulata</i> | UKBA125 | Upper Keys, Florida, USA     | Pickles Reef     | 24°59'15"N    | 80°24'52"W    |
| <i>B. annulata</i> | UKBA126 | Upper Keys, Florida, USA     | Pickles Reef     | 24°59'15"N    | 80°24'52"W    |
| <i>B. annulata</i> | UKBA128 | Upper Keys, Florida, USA     | Snapper Ledge    | 24°58'55"N    | 80°24'52"W    |
| <i>B. annulata</i> | UKBA129 | Upper Keys, Florida, USA     | Snapper Ledge    | 24°58'55"N    | 80°24'52"W    |
| <i>B. annulata</i> | UKBA132 | Upper Keys, Florida, USA     | Snapper Ledge    | 24°58'55"N    | 80°24'52"W    |
| <i>B. annulata</i> | UKBA133 | Upper Keys, Florida, USA     | Snapper Ledge    | 24°58'55"N    | 80°24'52"W    |
| <i>B. annulata</i> | MKBA25  | Middle Keys, Florida, USA    | C                | 24°39'31"N    | 81°00'18"W    |

|                    |         |                              |                     |               |               |
|--------------------|---------|------------------------------|---------------------|---------------|---------------|
| <i>B. annulata</i> | MKBA26  | Middle Keys,<br>Florida, USA | Samantha<br>Reef    | 24°39'31"N    | 81°00'18"W    |
| <i>B. annulata</i> | MKBA29  | Middle Keys,<br>Florida, USA | Tropical<br>Rocks   | 24°39'38"N    | 81°00'60"W    |
| <i>B. annulata</i> | MKBA31  | Middle Keys,<br>Florida, USA | Tropical<br>Rocks   | 24°39'38"N    | 81°00'60"W    |
| <i>B. annulata</i> | MKBA34  | Middle Keys,<br>Florida, USA | Tropical<br>Rocks   | 24°39'38"N    | 81°00'60"W    |
| <i>B. annulata</i> | MKBA35  | Middle Keys,<br>Florida, USA | Tropical<br>Rocks   | 24°39'38"N    | 81°00'60"W    |
| <i>B. annulata</i> | MKBA39  | Middle Keys,<br>Florida, USA | Tropical<br>Rocks   | 24°39'38"N    | 81°00'60"W    |
| <i>B. annulata</i> | MKBA50  | Middle Keys,<br>Florida, USA | Elbow/Wrist         | 24°41'48"N    | 80°56'86"W    |
| <i>B. annulata</i> | MKBA51  | Middle Keys,<br>Florida, USA | Elbow/Wrist         | 24°41'48"N    | 80°56'86"W    |
| <i>B. annulata</i> | MKBA52  | Middle Keys,<br>Florida, USA | Elbow/Wrist         | 24°41'48"N    | 80°56'86"W    |
| <i>B. annulata</i> | LKBA70  | Lower Keys,<br>Florida, USA  | LK2                 | 24°33'42.39"N | 81°23'31.59"W |
| <i>B. annulata</i> | LKBA77  | Lower Keys,<br>Florida, USA  | LK2                 | 24°33'42.39"N | 81°23'31.59"W |
| <i>B. annulata</i> | LKBA83  | Lower Keys,<br>Florida, USA  | LK2                 | 24°33'42.39"N | 81°23'31.59"W |
| <i>B. annulata</i> | LKBA85  | Lower Keys,<br>Florida, USA  | LK2                 | 24°33'42.39"N | 81°23'31.59"W |
| <i>B. annulata</i> | LKBA88  | Lower Keys,<br>Florida, USA  | LK1                 | 24°33'26"N    | 81°30'36"W    |
| <i>B. annulata</i> | LKBA89  | Lower Keys,<br>Florida, USA  | LK1                 | 24°33'26"N    | 81°30'36"W    |
| <i>B. annulata</i> | LKBA93  | Lower Keys,<br>Florida, USA  | LK6                 | 24°33'59"N    | 81°23'60"W    |
| <i>B. annulata</i> | LKBA101 | Lower Keys,<br>Florida, USA  | LK6                 | 24°33'59"N    | 81°23'60"W    |
| <i>B. annulata</i> | LKBA102 | Lower Keys,<br>Florida, USA  | LK6                 | 24°33'59"N    | 81°23'60"W    |
| <i>B. annulata</i> | LKBA106 | Lower Keys,<br>Florida, USA  | LK6                 | 24°33'59"N    | 81°23'60"W    |
| <i>B. annulata</i> | UTBA3   | Utila,<br>Honduras           | Coral View          | 16°5'18.03"N  | 86°54'38.54"W |
| <i>B. annulata</i> | UTBA5   | Utila,<br>Honduras           | Lighthouse<br>Reef  | 16° 5'8.75"N  | 86°53'23.76"W |
| <i>B. annulata</i> | UTBA7   | Utila,<br>Honduras           | Lighthouse<br>Reef  | 16° 5'8.75"N  | 86°53'23.76"W |
| <i>B. annulata</i> | UTBA8   | Utila,<br>Honduras           | Lighthouse<br>Reef  | 16° 5'8.75"N  | 86°53'23.76"W |
| <i>B. annulata</i> | UTBA10  | Utila,<br>Honduras           | Black Coral<br>Wall | 16°5'6.85"N   | 86°54'53.07"W |
| <i>B. annulata</i> | UTBA11  | Utila,<br>Honduras           | Black Coral<br>Wall | 16°5'6.85"N   | 86°54'53.07"W |
| <i>B. annulata</i> | UTBA12  | Utila,<br>Honduras           | Black Coral<br>Wall | 16°5'6.85"N   | 86°54'53.07"W |
| <i>B. annulata</i> | UTBA18  | Utila,<br>Honduras           | Coral View          | 16°5'18.03"N  | 86°54'38.54"W |
| <i>B. annulata</i> | UTBA21  | Utila,<br>Honduras           | Coral View          | 16°5'18.03"N  | 86°54'38.54"W |

|                    |        |                                |                     |               |               |
|--------------------|--------|--------------------------------|---------------------|---------------|---------------|
| <i>B. annulata</i> | UTBA23 | Utila,<br>Honduras             | Coral View          | 16°5'18.03"N  | 86°54'38.54"W |
| <i>B. annulata</i> | CCBA2  | Cayos<br>Cochinos,<br>Honduras | Pelly 2             | 15°57'37.62"N | 86°30'16.22"W |
| <i>B. annulata</i> | CCBA6  | Cayos<br>Cochinos,<br>Honduras | Pelly 2             | 15°57'37.62"N | 86°30'16.22"W |
| <i>B. annulata</i> | CCBA12 | Cayos<br>Cochinos,<br>Honduras | House Reef          | 15°57'4.27"N  | 86°29'59.70"W |
| <i>B. annulata</i> | CCBA13 | Cayos<br>Cochinos,<br>Honduras | House Reef          | 15°57'4.27"N  | 86°29'59.70"W |
| <i>B. annulata</i> | CCBA14 | Cayos<br>Cochinos,<br>Honduras | House Reef          | 15°57'4.27"N  | 86°29'59.70"W |
| <i>B. annulata</i> | CCBA15 | Cayos<br>Cochinos,<br>Honduras | House Reef          | 15°57'4.27"N  | 86°29'59.70"W |
| <i>B. annulata</i> | CCBA16 | Cayos<br>Cochinos,<br>Honduras | House Reef          | 15°57'4.27"N  | 86°29'59.70"W |
| <i>B. annulata</i> | CCBA18 | Cayos<br>Cochinos,<br>Honduras | House Reef          | 15°57'4.27"N  | 86°29'59.70"W |
| <i>B. annulata</i> | CCBA24 | Cayos<br>Cochinos,<br>Honduras | Pelly 2             | 15°57'37.62"N | 86°30'16.22"W |
| <i>B. annulata</i> | MXBA1  | Mahahual,<br>Mexico            | El Castillo<br>Reef | 18°37'39.81"N | 87°43'38.36"W |
| <i>B. annulata</i> | MXBA4  | Mahahual,<br>Mexico            | El Castillo<br>Reef | 18°37'39.81"N | 87°43'38.36"W |
| <i>B. annulata</i> | MXBA7  | Mahahual,<br>Mexico            | El Castillo<br>Reef | 18°37'39.81"N | 87°43'38.36"W |
| <i>B. annulata</i> | MXBA9  | Mahahual,<br>Mexico            | El Castillo<br>Reef | 18°37'39.81"N | 87°43'38.36"W |
| <i>B. annulata</i> | MXBA10 | Mahahual,<br>Mexico            | El Castillo<br>Reef | 18°37'39.81"N | 87°43'38.36"W |
| <i>B. annulata</i> | MXBA11 | Mahahual,<br>Mexico            | El Castillo<br>Reef | 18°37'39.81"N | 87°43'38.36"W |
| <i>B. annulata</i> | MXBA12 | Mahahual,<br>Mexico            | El Castillo<br>Reef | 18°37'39.81"N | 87°43'38.36"W |
| <i>B. annulata</i> | MXBA13 | Mahahual,<br>Mexico            | El Castillo<br>Reef | 18°37'39.81"N | 87°43'38.36"W |
| <i>B. annulata</i> | MXBA21 | Mahahual,<br>Mexico            | Punta Piedra        | 18°40'59.05"N | 87°42'46.81"W |
| <i>B. annulata</i> | MXBA23 | Mahahual,<br>Mexico            | Punta Piedra        | 18°40'59.05"N | 87°42'46.81"W |
| <i>B. annulata</i> | PABA6  | Bocas del<br>Toro, Panama      | Adriana's<br>Reef   | 9°14'35.14"N  | 82°10'7.67"W  |
| <i>B. annulata</i> | PABA7  | Bocas del<br>Toro, Panama      | Adriana's<br>Reef   | 9°14'35.14"N  | 82°10'7.67"W  |
| <i>B. annulata</i> | PABA8  | Bocas del<br>Toro, Panama      | Adriana's<br>Reef   | 9°14'35.14"N  | 82°10'7.67"W  |

|                    |        |                               |                |               |               |
|--------------------|--------|-------------------------------|----------------|---------------|---------------|
| <i>B. annulata</i> | PABA9  | Bocas del Toro, Panama        | Adriana's Reef | 9°14'35.14"N  | 82°10'7.67"W  |
| <i>B. annulata</i> | PABA10 | Bocas del Toro, Panama        | Adriana's Reef | 9°14'35.14"N  | 82°10'7.67"W  |
| <i>B. annulata</i> | PABA14 | Bocas del Toro, Panama        | Adriana's Reef | 9°14'35.14"N  | 82°10'7.67"W  |
| <i>B. annulata</i> | PABA15 | Bocas del Toro, Panama        | Adriana's Reef | 9°14'35.14"N  | 82°10'7.67"W  |
| <i>B. annulata</i> | PABA17 | Bocas del Toro, Panama        | Punta Caracol  | 9°21'30.45"N  | 82°16'43.93"W |
| <i>B. annulata</i> | PABA18 | Bocas del Toro, Panama        | Punta Caracol  | 9°21'30.45"N  | 82°16'43.93"W |
| <i>B. annulata</i> | PABA24 | Bocas del Toro, Panama        | Punta Caracol  | 9°21'30.45"N  | 82°16'43.93"W |
| <i>B. annulata</i> | STBA3  | St. Thomas, US Virgin Islands | Brewer's Bay   | 18°20'27.30"N | 64°58'41.86"W |
| <i>B. annulata</i> | STBA5  | St. Thomas, US Virgin Islands | Brewer's Bay   | 18°20'27.30"N | 64°58'41.86"W |
| <i>B. annulata</i> | STBA7  | St. Thomas, US Virgin Islands | Brewer's Bay   | 18°20'27.30"N | 64°58'41.86"W |
| <i>B. annulata</i> | STBA9  | St. Thomas, US Virgin Islands | Brewer's Bay   | 18°20'27.30"N | 64°58'41.86"W |
| <i>B. annulata</i> | STBA13 | St. Thomas, US Virgin Islands | Brewer's Bay   | 18°20'27.30"N | 64°58'41.86"W |
| <i>B. annulata</i> | STBA15 | St. Thomas, US Virgin Islands | Brewer's Bay   | 18°20'27.30"N | 64°58'41.86"W |
| <i>B. annulata</i> | STBA16 | St. Thomas, US Virgin Islands | Brewer's Bay   | 18°20'27.30"N | 64°58'41.86"W |
| <i>B. annulata</i> | STBA24 | St. Thomas, US Virgin Islands | Flat Key       | 18°19'0.69"N  | 64°59'22.59"W |
| <i>B. annulata</i> | STBA29 | St. Thomas, US Virgin Islands | Flat Key       | 18°19'0.69"N  | 64°59'22.59"W |
| <i>B. annulata</i> | STBA30 | St. Thomas, US Virgin Islands | Flat Key       | 18°19'0.69"N  | 64°59'22.59"W |
| <i>B. annulata</i> | STBA31 | St. Thomas, US Virgin Islands | Flat Key       | 18°19'0.69"N  | 64°59'22.59"W |

Table S2. List of *Bartholomea annulata* samples used in the SNAPP & Bayes Factor Delimitation\* (BFD\*) species delimitation analyses. Sample ID refers to unique identifier code provided to each individual in the dataset. Clade refers to the cryptic lineage sample assignment according to Structure. Locality refers to the broad biogeographic country/island of origin of each sample. Sample site refers to the specific reef or sample site each sample was collected from at each Locality. GPS coordinates are provided for each Sample Site. Samples are listed alphabetically by locality then numerically by Sample ID.

| <b>Species</b>     | <b>Clade</b> | <b>Sample ID</b> | <b>Locality</b>                    | <b>Sample Site</b>  | <b>Latitude</b> | <b>Longitude</b> |
|--------------------|--------------|------------------|------------------------------------|---------------------|-----------------|------------------|
| <i>B. annulata</i> | Clade 1      | BHBA13           | Eleuthera,<br>Bahamas              | Something to<br>See | 24°49'5.28"N    | 76°20'51.80"W    |
| <i>B. annulata</i> | Clade 2      | BDBA3            | Bermuda                            | Lagoonal<br>Shelf   | 32°26'53.62"N   | 64°45'45.42"W    |
| <i>B. annulata</i> | Clade 1      | CUBA26           | Curacao                            | CARMABI             | 12°7'19.45"N    | 68°58'10.80"W    |
| <i>B. annulata</i> | Clade 2      | FTBA19           | Ft.<br>Lauderdale,<br>Florida, USA | Caves               | 26°7'31.0"N     | 80°5'31.00"W     |
| <i>B. annulata</i> | Clade 1      | MKBA25           | Middle Keys,<br>Florida, USA       | Samantha<br>Reef    | 24°39'31"N      | 81°00'18"W       |

|                           |          |            |                               |                  |              |               |
|---------------------------|----------|------------|-------------------------------|------------------|--------------|---------------|
| <i>B. annulata</i>        | Clade 1  | PABA7      | Bocas del Toro, Panama        | Adriana's Reef   | 9°14'35.14"N | 82°10'7.67"W  |
| <i>B. annulata</i>        | Clade 1  | PABA10     | Bocas del Toro, Panama        | Adriana's Reef   | 9°14'35.14"N | 82°10'7.67"W  |
| <i>B. annulata</i>        | Clade 2  | PABA18     | Bocas del Toro, Panama        | Punta Caracol    | 9°21'30.45"N | 82°16'43.93"W |
| <i>B. annulata</i>        | Clade 2  | STBA29     | St. Thomas, US Virgin Islands | Flat Key         | 18°19'0.69"N | 64°59'22.59"W |
| <i>B. annulata</i>        | Clade 2  | UTBA12     | Utila Honduras                | Black Coral Wall | 16°5'6.85"N  | 86°54'53.07"W |
| <i>Exaiptasia pallida</i> | Outgroup | Exaiptasia | N/A                           | N/A              | N/A          | N/A           |

Table S3. List of *Bartholomea annulata* samples used in the *fastsimcoal2* (FSC2) simulation and model selection analyses. Sample ID refers to unique identifier code provided to each individual in the dataset. Clade refers to the cryptic lineage sample assignment according to Structure. Locality refers to the broad biogeographic country/island of origin of each sample. Sample site refers to the specific reef or sample each sample was collected from at each Locality. GPS coordinates are provided for each Sample Site. Samples are listed alphabetically by locality then numerically by Sample ID. FSC model selection dataset

| Species            | Clade   | Sample ID | Locality           | Sample Site      | Latitude      | Longitude     |
|--------------------|---------|-----------|--------------------|------------------|---------------|---------------|
| <i>B. annulata</i> | Clade 2 | BHBA2     | Eleuthera, Bahamas | Something to See | 24°49'5.28"N  | 76°20'51.80"W |
| <i>B. annulata</i> | Clade 1 | BHBA8     | Eleuthera, Bahamas | Something to See | 24°49'5.28"N  | 76°20'51.80"W |
| <i>B. annulata</i> | Clade 1 | BHBA13    | Eleuthera, Bahamas | Something to See | 24°49'5.28"N  | 76°20'51.80"W |
| <i>B. annulata</i> | Clade 2 | BHBA20    | Eleuthera, Bahamas | Lion Patch       | 24°49'44.51"N | 76°16'46.11"W |
| <i>B. annulata</i> | Clade 2 | BHBA23    | Eleuthera, Bahamas | Lion Patch       | 24°49'44.51"N | 76°16'46.11"W |



|                    |         |         |                              |                  |               |               |
|--------------------|---------|---------|------------------------------|------------------|---------------|---------------|
| <i>B. annulata</i> | Clade 2 | SANBA4  | San Salvador, Bahamas        | Fernandez Bay    | 24°2'37.12"N  | 74°31'59.83"W |
| <i>B. annulata</i> | Clade 2 | SANBA13 | San Salvador, Bahamas        | Fernandez Bay    | 24°2'37.12"N  | 74°31'59.83"W |
| <i>B. annulata</i> | Clade 2 | BDBA3   | Bermuda                      | Lagoonal Shelf   | 32°26'53.62"N | 64°45'45.42"W |
| <i>B. annulata</i> | Clade 2 | BRBA25  | Barbados                     | Bellairs         | 13°11'30.52"N | 59°38'29.04"W |
| <i>B. annulata</i> | Clade 1 | BRBA27  | Barbados                     | Jolly Roger      | 13°11'13.04"N | 59°38'22.94"W |
| <i>B. annulata</i> | Clade 2 | BRBA33  | Barbados                     | Jolly Roger      | 13°11'13.04"N | 59°38'22.94"W |
| <i>B. annulata</i> | Clade 2 | FTBA11  | Ft. Lauderdale, Florida, USA | Hog Heaven       | 26°8'50.69"N  | 80°4'11.45"W  |
| <i>B. annulata</i> | Clade 1 | FTBA12  | Ft. Lauderdale, Florida, USA | Hog Heaven       | 26°8'50.69"N  | 80°4'11.45"W  |
| <i>B. annulata</i> | Clade 2 | FTBA19  | Ft. Lauderdale, Florida, USA | Caves            | 26°7'31.0"N   | 80°5'31.00"W  |
| <i>B. annulata</i> | Clade 2 | FTBA147 | Ft. Lauderdale, Florida, USA | Caves            | 26°7'31.0"N   | 80°5'31.00"W  |
| <i>B. annulata</i> | Clade 2 | LKBA77  | Lower Keys, Florida, USA     | LK2              | 24°33'42.39"N | 81°23'31.59"W |
| <i>B. annulata</i> | Clade 2 | LKBA101 | Lower Keys, Florida, USA     | LK6              | 24°33'59"N    | 81°23'60"W    |
| <i>B. annulata</i> | Clade 1 | LKBA106 | Lower Keys, Florida, USA     | LK6              | 24°33'59"N    | 81°23'60"W    |
| <i>B. annulata</i> | Clade 1 | MKBA25  | Middle Keys, Florida, USA    | Samantha Reef    | 24°39'31"N    | 81°00'18"W    |
| <i>B. annulata</i> | Clade 1 | MKBA26  | Middle Keys, Florida, USA    | Samantha Reef    | 24°39'31"N    | 81°00'18"W    |
| <i>B. annulata</i> | Clade 1 | MKBA35  | Middle Keys, Florida, USA    | Tropical Rocks   | 24°39'38"N    | 81°00'60"W    |
| <i>B. annulata</i> | Clade 2 | UKBA122 | Upper Keys, Florida, USA     | Pickles Reef     | 24°59'15"N    | 80°24'52"W    |
| <i>B. annulata</i> | Clade 2 | UKBA125 | Upper Keys, Florida, USA     | Pickles Reef     | 24°59'15"N    | 80°24'52"W    |
| <i>B. annulata</i> | Clade 2 | CCBA15  | Cayos Cochinos, Honduras     | House Reef       | 15°57'4.27"N  | 86°29'59.70"W |
| <i>B. annulata</i> | Clade 2 | MXBA4   | Mahahual, Mexico             | El Castillo Reef | 18°37'39.81"N | 87°43'38.36"W |
| <i>B. annulata</i> | Clade 2 | MXBA9   | Mahahual, Mexico             | El Castillo Reef | 18°37'39.81"N | 87°43'38.36"W |
| <i>B. annulata</i> | Clade 1 | MXBA11  | Mahahual, Mexico             | El Castillo Reef | 18°37'39.81"N | 87°43'38.36"W |
| <i>B. annulata</i> | Clade 1 | PABA6   | Bocas del Toro, Panama       | Adriana's Reef   | 9°14'35.14"N  | 82°10'7.67"W  |
| <i>B. annulata</i> | Clade 1 | PABA7   | Bocas del Toro, Panama       | Adriana's Reef   | 9°14'35.14"N  | 82°10'7.67"W  |

|                    |         |        |                                  |                  |               |               |
|--------------------|---------|--------|----------------------------------|------------------|---------------|---------------|
| <i>B. annulata</i> | Clade 1 | PABA8  | Bocas del Toro,<br>Panama        | Adriana's Reef   | 9°14'35.14"N  | 82°10'7.67"W  |
| <i>B. annulata</i> | Clade 1 | PABA9  | Bocas del Toro,<br>Panama        | Adriana's Reef   | 9°14'35.14"N  | 82°10'7.67"W  |
| <i>B. annulata</i> | Clade 1 | PABA10 | Bocas del Toro,<br>Panama        | Adriana's Reef   | 9°14'35.14"N  | 82°10'7.67"W  |
| <i>B. annulata</i> | Clade 1 | PABA14 | Bocas del Toro,<br>Panama        | Adriana's Reef   | 9°14'35.14"N  | 82°10'7.67"W  |
| <i>B. annulata</i> | Clade 1 | PABA15 | Bocas del Toro,<br>Panama        | Adriana's Reef   | 9°14'35.14"N  | 82°10'7.67"W  |
| <i>B. annulata</i> | Clade 2 | PABA18 | Bocas del Toro,<br>Panama        | Punta Caracol    | 9°21'30.45"N  | 82°16'43.93"W |
| <i>B. annulata</i> | Clade 2 | STBA15 | St. Thomas,<br>US Virgin Islands | Brewer's Bay     | 18°20'27.30"N | 64°58'41.86"W |
| <i>B. annulata</i> | Clade 2 | STBA16 | St. Thomas,<br>US Virgin Islands | Brewer's Bay     | 18°20'27.30"N | 64°58'41.86"W |
| <i>B. annulata</i> | Clade 2 | STBA29 | St. Thomas,<br>US Virgin Islands | Brewer's Bay     | 18°20'27.30"N | 64°58'41.86"W |
| <i>B. annulata</i> | Clade 2 | STBA7  | St. Thomas,<br>US Virgin Islands | Flat Key         | 18°19'0.69"N  | 64°59'22.59"W |
| <i>B. annulata</i> | Clade 2 | UTBA12 | Utila,<br>Honduras               | Black Coral Wall | 16°5'6.85"N   | 86°54'53.07"W |

## Supplementary Figures

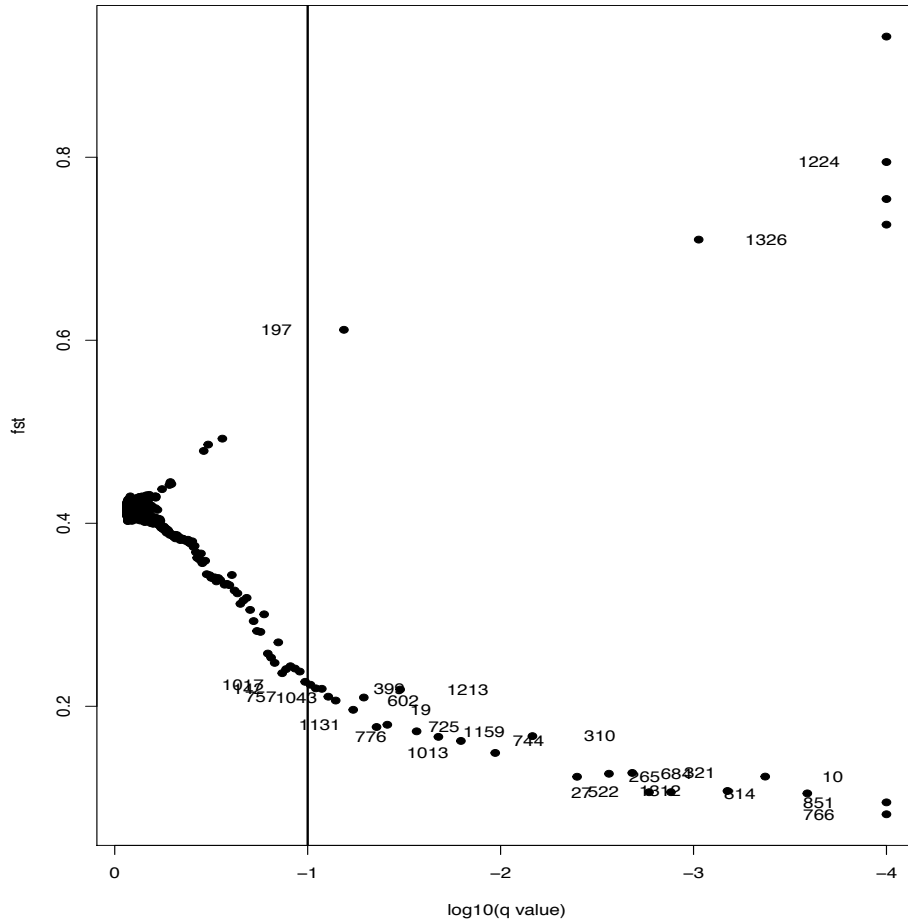

Figure S1. Genome scan outlier loci detection results from BayeScan. Of the 31 loci detected, 6 appear to be under divergent selection and show high  $F_{st}$  values. The remaining 25 outlier loci appear to be under balancing selection and show low  $F_{st}$  values. Numbers on figure represents the loci under selection. The vertical bar represents the cutoff between neutrally evolving loci (to the left of the bar) and those under putative selection (to the right of the bar).
